# Supplementary material for: Arterial stiffness and cardiac dysfunction in Hutchinson–Gilford Progeria Syndrome corrected by inhibition of lysyl oxidase
Source: Life Sci Alliance. 2021 Mar 9;4(5):e202000997. doi: 10.26508/lsa.202000997 (PMC8008950; doi:10.26508/lsa.202000997)
Supplement: Supplementary file 2 [file LSA-2020-00997_TableS1.xlsx]

## Sheet: Sheet1
Genotype	IVS (mean)	IVS (SD)	n	p
WT	1.83	0.02	5	reference
HGPS	1.8	0.03	5	NS
Table S1. In Vivo Stretch (IVS) values for mixed sex, 1-month WT and HGPS mice. Significance was determined by Mann-Whitney test. NS; not significant.
